# Supplementary material
Source: PubMed Central journal article supplement (PMC10581447)
Supplement: NIHMS1934563-supplement-AF-ARDS-Supplement_Thorax_revised.pdf [file NIHMS1934563-supplement-AF-ARDS-Supplement_Thorax_revised.pdf]

## Supplementary file

### Authors

Rohit Saha<sup>1</sup>; Tàì Pham<sup>2,3,4,5</sup>; Pratik Sinha<sup>6</sup>; Manoj V. Maddali<sup>7</sup>; Giacomo Bellani<sup>8,9,10,11</sup>; Eddy Fan<sup>3</sup>; Charlotte Summers<sup>12</sup>; Abdel Douiri<sup>13</sup>; Gordon Rubenfeld<sup>14</sup>; Carolyn S. Calfee<sup>15,16</sup>; John G Laffey<sup>2,3,17,18</sup>; Daniel F McAuley<sup>19</sup>; Manu Shankar-Hari<sup>20</sup> on behalf of the LUNG SAFE Investigators and the European Society of Intensive Care Medicine Trials Group

### Affiliations and addresses

1. Critical Care, King's College Hospital NHS Foundation Trust, London, United Kingdom.
2. Keenan Research Centre, Li Ka Shing Knowledge Institute, St Michael's Hospital, Unity Health Toronto, Toronto, ON, Canada.
3. Interdepartmental Division of Critical Care Medicine, University of Toronto, Toronto, ON, Canada.
4. Université Paris-Saclay, AP-HP, Service de médecine intensive-réanimation, Hôpital de Bicêtre, DMU CORREVE, FHU SEPSIS, Groupe de recherche clinique CARMAS, Le Kremlin-Bicêtre, France.
5. Université Paris-Saclay, UVSQ, Université Paris-Sud, Inserm, Equipe d'Epidémiologie respiratoire intégrative, CESP, Villejuif, France.
6. Department of Anesthesiology, Washington University in St. Louis, St. Louis, Missouri.
7. Division of Pulmonary, Allergy, and Critical Care Medicine, Department of Medicine, Stanford University, Stanford, CA, USA.
8. School of Medicine and Surgery, University of Milan-Bicocca, Monza, Italy.
9. Dept of Emergency and Intensive Care, San Gerardo Hospital, Monza, Italy.
10. Dept of Medicine, University Health Network and Mount Sinai Hospital, Toronto, ON, Canada.
11. Interdepartmental Division of Critical Care Medicine and Institute of Health Policy, Management and Evaluation, University of Toronto, Toronto, ON, Canada
12. Wolfson Lung Injury Unit, Heart and Lung Research Institute, University of Cambridge, Cambridge, United Kingdom.
13. School of Population Health & Environmental Sciences, King's College London, London, United Kingdom.
14. Interdepartmental Division of Critical Care Medicine, University of Toronto and Program in Trauma, Emergency and Critical Care, Sunnybrook Health Sciences Center, Toronto, ON, Canada.
15. Cardiovascular Research Institute, University of California, San Francisco; Department of Medicine, Division of Pulmonary, Critical Care, Allergy and Sleep Medicine, University of California, San Francisco.
16. Department of Anesthesia and Perioperative Care, University of California, San Francisco.
17. Dept of Anesthesia and Intensive Care Medicine, Galway University Hospitals, Galway, Ireland.
18. School of Medicine, and Regenerative Medicine Institute (REMEDI) at CÚRAM Centre for Research in Medical Devices, National University of Ireland Galway, Galway, Ireland.
19. The Wellcome-Wolfson Institute For Experimental Medicine, School of Medicine, Dentistry and Biomedical Sciences, Belfast, Ireland; Royal Victoria Hospital, Belfast Health and Social Care Trust, Belfast, Ireland.
20. Centre for Inflammation Research, University of Edinburgh, Edinburgh, United Kingdom.

## **LUNG SAFE investigator list**

**LUNG SAFE Steering Committee:** Antonio Pesenti, M.D., John G. Laffey, M.D., Ph.D., Laurent Brochard, M.D., Andres Esteban, M.D., Luciano Gattinoni, M.D., F.R.C.P., Frank van Haren, M.D., Ph.D., Anders Larsson, M.D., Ph.D., Daniel F. McAuley, M.D., Ph.D., Marco Ranieri, M.D., Gordon Rubinfeld, M.D., M.Sc., B. Taylor Thompson, M.D., Hermann Wrigge, M.D., Ph.D., Arthur S. Slutsky, M.D.

**LUNG SAFE executive Committee:** John G. Laffey, Giacomo, Bellani, Tàì Pham, Eddy Fan

**LUNG SAFE national Coordinators:** Argentina: Fernando Rios; Australia/New Zealand: Frank Van Haren; Belgium: Thierry Sottiaux, Pieter Depuydt; Bolivia: Fredy S. Lora; Brazil: Luciano Cesar Azevedo; Canada: Eddy Fan; Chile: Guillermo Bugedo; China: Haibo Qiu; Colombia: Marcos Gonzalez; Costa Rica: Juan Silesky; Czech Republic: Vladimir Cerny; Denmark: Jonas Nielsen; Ecuador: Manuel Jibaja; France: Tàì Pham; Germany: Hermann Wrigge; Greece: Dimitrios Matamis; Guatemala: Jorge Luis Ranero; India: Pravin Amin; Iran: S.M. Hashemian; Ireland: Kevin Clarkson; Italy: Giacomo Bellani; Japan: Kiyoyasu Kurahashi; Mexico: Asisclo Villagomez; Morocco: Amine Ali Zeggwagh; Netherlands: Leo M. Heunks; Norway: Jon Henrik Laake; Philippines: Jose Emmanuel Palo; Portugal: Antero do Vale Fernandes; Romania: Dorel Sandesc; Saudi Arabia: Yaasen Arabi; Serbia: Vesna Bumbasierevic; Spain: Nicolas Nin, Jose A. Lorente; Sweden: Anders Larsson; Switzerland: Lise Piquilloud; Tunisia: Fekri Abroug; United Kingdom: Daniel F. McAuley, Lia McNamee; Uruguay: Javier Hurtado; United States: Ed Bajwa; Venezuela: Gabriel Démpaire

### **LUNG SAFE Site investigators (by country):**

**Albania:** Uhc Mother Theresa, Tirana: Hektor Sula, Lordian Nunci; University Hospital Shefqet Ndroqi, Tirana: Alma Cani

**Argentina:** Clinica de Especialidades, Villa Maria: Alan Zazu; Hospital Julio C. Perrando, Resistencia: Christian Dellera, Carolina S. Insaurralde; Sanatorio Las Lomas, San Isidro, Buenos Aires: Risso V. Alejandro; Sanatorio de La Trinidad San Isidro, San Isidro: Julio Daldin, Mauricio Vinzio; Hospital Español de Mendoza, Godoy Cruz-Mendoza: Ruben O. Fernandez; Hospital del Centenario, Rosario: Luis P. Cardonnet, Lisandro R. Bettini; San Antonio, Gualeguay, Entre Rios: Mariano Carboni Bisso, Emilio M. Osman; Cemic, Buenos Aires: Mariano G. Setten, Pablo Lovazzano; Hospital Universitario Austral, Pilar: Javier Alvarez, Veronica Villar; Hospital Por + Salud, Pami Dr. Cesar Milstein, Buenos Aires: Norberto C. Pozo, Nicolas Grubissich; Sanatorio Anchorena, Buenos Aires: Gustavo A. Plotnikow, Daniela N. Vasquez; Sanatorio de La Trinidad Mitre, Buenos Aires: Santiago Ilutovich, Norberto Tiribelli; Hospital Luis agomaggiore, Mendoza: Ariel Chena, Carlos A. Pellegrini; Hospital Interzonal General de Agudos, San Martín, La Plata: María G. Saenz, Elisa Estenssoro; Hospital Misericordia, Cordoba: Matias Brizuela, Hernan Gianinetto; Sanatorio Juncal, Temperley: Pablo E. Gomez, Valeria I. Cerrato; Hospital D.F. Santojanni, Buenos Aires: Marco G. Bezzi, Silvina A. Borello; Hospital Alejandro Posadas, Buenos Aires: Flavia A. Loiacono, Adriana M. Fernandez

**Australia:** St. Vincent's Hospital, Sydney: Serena Knowles, Claire Reynolds; St. George Public Hospital, Kogarah: Deborah M. Inskip, Jennene J. Miller; Westmead Hospital, Westmead: Jing Kong, Christina Whitehead; Flinders Medical Center, Bedford Park: Shailesh Bihari; John Hunter Hospital, Newcastle: Aylin Seven, Amanda Krstevski; Canberra Hospital, Garran: Helen J. Rodgers, Rebecca T. Millar; Calvary Mater Newcastle, Waratah: Toni E. Mckenna, Irene M. Bailey; Cabrini Hospital, Melbourne: Gabrielle C. Hanlon; Liverpool Hospital, Liverpool: Anders Aneman, Joan M. Lynch; Coffs Harbour Health Campus, Coffs Harbour: Raman Azad, John Neal; Sir Charles Gairdner Hospital, Nedlands: Paul W. Woods, Brigit L. Roberts; Concord Hospital, Concord: Mark R. Kol, Helen S. Wong

**Austria:** General Hospital of Vienna/Medical University of Vienna, Vienna: Katharina C. Riss, Thomas Staudinger

**Belgium:** Cliniques Universitaires St. Luc, Université Catholique de Louvain, Brussels: Xavier Wittebole, Caroline Berghé; Center Hospitalier Universitaire DinantGodinne, Yvoir: Pierre A. Bulpa, Alain M. Dive; Acut Ziekenhuis Sint Augustinus Veurne, Veurne: Rik Verstraete, Herve Lebbinck;

Ghent University Hospital, Ghent: Pieter Depuydt, Joris Vermassen; University Hospitals Leuven, Leuven: Philippe Meersseman, Helga Ceunen

**Brazil:** Hospital Renascentista, Pouso Alegre: Jonas I. Rosa, Daniel O. Beraldo; Vitoria Apart Hospital, Serra: Claudio Piras, Adenilton M. Rampinelli; Hospital Das Clinicas, São Paulo: Antonio P. Nassar, Jr.; Hospital Geral Do Grajaù, São Paulo: Sergio Mataloun, Marcelo Moock; Evangelical Hospital, Cachoeiro de Itapemirim/Espírito Santo: Marlus M. Thompson, Claudio H. Gonçalves; Hospital Moinhos de Vento, Porto Alegre: Ana Carolina P. Antônio, Aline Ascoli; Hospital Alvorada Taguatinga, Taguatinga: Rodrigo S.

Biondi, Danielle C. Fontenele; Complexo Hospitalar Mngabeira Tarcisio Burity, Joao Pessoa: Danielle Nobrega, Vanessa M. Sales

**Brunei:** Raja Isteri Pengiran Anak Saleha Hospital, Bandar Seri Begawan: Ahmad Yazid Bin HJ Abul Wahab, Maizatul Ismail, Suresh Shindhe

**Canada:** Medical-Surgical Intensive Care Unit of St. Michael's Hospital, Toronto: John Laffey, Francois Beloncle; St. Joseph's Health Center, Toronto: Kyle G. Davies, Rob Cirone; Sunnybrook Health Sciences Center, Toronto: Venika Manoharan, Mehvish Ismail; Toronto Western Hospital, Toronto: Ewan C. Goligher, Mandeep Jassal; Medical Surgical Intensive Care Unit of the Toronto General Hospital, Toronto: Erin Nishikawa, Areej Javeed; Cardiovascular Intensive Care Unit of St. Michael's Hospital, Toronto: Gerard Curley, Nuttapol Rittayamai; Cardiovascular Intensive Care Unit of the Toronto General Hospital, Toronto: Matteo Parotto, Niall D. Ferguson; Mount Sinai Hospital, Toronto: Sangeeta Mehta, Jenny Knoll; Trauma-Neuro Intensive Care Unit of St. Michael's Hospital, Toronto: Antoine Pronovost, Sergio Canestrini

**Chile:** Hospital Clínico Pontificia Universidad Católica de Chile, Santiago: Alejandro R. Bruhn, Patricio H. Garcia; Hospital Militar de Santiago, Santiago: Felipe A. Aliaga, Pamela A. Farías; Clinica Davila, Santiago: Jacob S. Yumha; Hospital Guillermo Grant Benavente, Concepcion: Claudia A. Ortiz, Javier E. Salas; Clinica Las Lilas, Santiago: Alejandro A. Saez, Luis D. Vega; Hospital Naval Almirante Nef, Viña del Mar: Eduardo F. Labarca, Felipe T. Martinez; Hospital Luis Tisné Brousse, Penanolen: Nicolás G. Carreño, Pilar Lora

**China:** Second Affiliated Hospital of Harbin Medical University, Harbin: Haitao Liu; Nanjing Zhong-da Hospital, Southeast University, Nanjing: Haibo Qiu, Ling Liu; First Affiliated Hospital of Anhui Medical University, Hefei: Rui/Tang, Xiaoming Luo; Peking University People's Hospital, Beijing: Youzhong An, Huiying Zhao; Fourth Affiliated Hospital of Harbin Medical University, Harbin: Yan Gao, Zhe Zhai; Nanjing Jiangbei People's Hospital Affiliated to Medical School of Southeast University, Nanjing: Zheng L. Ye, Wei Wang; First Affiliated Hospital of Dalian Medical University, Dalian: Wenwen Li, Qingdong Li; Subei People's Hospital of Jiangsu Province, Yangzhou: Ruiqiang Zheng; Jinling Hospital, Nanjing: Wenkui Yu,

Juanhong Shen; Urumqi General Hospital, Urumqi: Xinyu Li; Intensive Care Unit, First Affiliated Hospital of Wannan Medical College, Yijishan Hospital, Wuhu: Tao Yu, Weihua Lu; Sichuan Provincial People's Hospital, Chengdu: Ya Q. Wu, Xiao B. Huang; Hainan Province People's Hospital, Haikou: Zhenyang He; People's Hospital of Jiangxi Province, Nanchang: Yuanhua Lu; Qilu Hospital of Shandong University, Jinan: Hui Han, Fan Zhang; Zhejiang Provincial People's Hospital, Hangzhou: Renhua Sun; First Affiliated

Hospital of Bengbu Medical College, Bengbu, Anhui: Hua X. Wang, Shu H. Qin; Nanjing Municipal Government Hospital, Nanjing: Bao H. Zhu, Jun Zhao; First Hospital of Lanzhou University, Lanzhou: Jian Liu, Bin Li; First Affiliated Hospital of Chongqing University of Medical Science, Chongqing: Jing L. Liu, Fa C. Zhou; Xuzhou Central Hospital, Xuzhou: Qiong J. Li, Xing Y. Zhang; First People's Hospital of Foshan, Foshan: Zhou Li-Xin, Qiang Xin-Hua; First Affiliated Hospital of Guangxi Medical University, Nanning: Liangyan Jiang; Renji Hospital, Shanghai Jiao Tong University School of Medicine, Shanghai: Yuan N. Gao, Xian Y. Zhao; First Hospital of Shanxi Medical University, Taiyuan: Yuan Y. Li, Xiao L. Li; Shandong Provincial Hospital, Jinan: Chunting Wang, Qingchun Yao; Fujian Provincial Hospital, Fuzhou: Rongguo Yu, Kai Chen; Henan Provincial People's Hospital, Zhengzhou: Huanzhang Shao, Bingyu Qin; Second Affiliated Hospital of Kunming Medical University, Kunming City: Qing Q. Huang, Wei H. Zhu; Xiangya Hospital, Central South University, Changsha: Ai Y. Hang, Ma X. Hua; First Affiliated Hospital of Guangzhou Medical University, Guangzhou: Yimin Li, Yonghao Xu; People's Hospital of Hebei Province, Shijiazhuang: Yu D. Di, Long L. Ling; Guangdong General Hospital, Guangzhou: Tie H. Qin, Shou H. Wang; Beijing Tongren Hospital, Beijing: Junping Qin; Jiangsu Province Hospital, Nanjing: Yi Han, Suming Zhou

**Colombia:** Fundación Valle del Lili, Cali: Monica P. Vargas

**Costa rica:** Hospital San Juan De Dios, San Jose: Juan I. Silesky Jimenez, Manuel A. González Rojas, Jaime E. SolisQuesada, Christian M. Ramirez-Alfaro

**Czech republic:** University Hospital of Ostrava, Ostrava: Jan Máca, Peter Sklienka

**Denmark:** Aarhus Universitetshospital, Aarhus: Jakob Gjedsted, Aage Christiansen; Rigshospitalet: Jonas Nielsen

**Ecuador:** Hospital Militar, Quito: Boris G. Villamagua, iguel Llano

**France:** Clinique du Millenaire, Montpellier: Philippe Burtin, Gautier Buzancais; Center Hospitalier, Roanne: Pascal Beuret, Nicolas Pelletier; Center Hospitalier Universitaire d'Angers, Angers: Satar Mortaza, Alain Mercat; Hôpital Marc Jacquet, Melun: Jonathan Chelly, Sébastien Jochmans; Center Hospitalier Universitaire Caen, Caen: Nicolas Terzi, Cédric Daubin; Henri Mondor Hospital, Créteil: Guillaume Carteaux, Nicolas de Prost; Cochin Hospital, Paris: Jean-Daniel Chiche, Fabrice Daviaud; Hôpital Tenon, Paris: Tàì Pham, Muriel Fartoukh; CH Mulhouse-Emile Muller, Mulhouse: Guillaume Barberet, Jerome Biehler; Archet 1 University Hospital, Nice: Jean Dellamonica, Denis Doyen; Hopital Sainte Musse, Toulon: Jean-Michel Arnal, Anais Briquet; Hopital Nord-Réanimation des Détresses Respiratoires et Infections Sévères, Marseille: Sami Hraiech, Laurent Papazian; Hôpital Européen Georges Pompidou, Paris: Arnaud Follin; Louis Mourier Hospital, Colombes: Damien Roux, Jonathan Messika; Center Hospitalier de Dax, Dax: Evangelos Kalaitzis; Réanimation Médicale, Groupe Hospitalier Pitié-Salpêtrière, Paris: Laurence Dangers, Alain Combes; Assistance Publique-Hôpitaux de Paris Ambroise Paré, Boulogne-Billancourt: Siu-Ming Au; University Hospital Rouen, Rouen: Gaetan Béduneau, Dorothée Carpentier; Center Hospitalier Universitaire Amiens, Amiens-Salouel: Elie H. Zogheib, Herve Dupont; Center Hospitalier Intercommunal Robert Ballanger, Aulnay-sous-Bois: Sylvie Ricome, Francesco L. Santoli; Center Hospitalier René Dubos, Pontoise: Sebastien L. Besset; Center Hospitalier Intercommunal Portes de l'Oise, Beaumont-sur-Oise: Philippe Michel, Bruno Gelée; Archet 2 University Hospital, Nice: Pierre-Eric Danin, Bernard Goubaux; Center Hospitalier Pierre Oudot, Bourgoin Jallieu: Philippe J. Crova, Nga T. Phan; Center Hospitalier Dunkerque, Dunkerque: Frantz Berkelmans; Center Hospitalier de Belfort Montbéliard, Belfort: Julio C. Badie, Romain Tapponnier; Center Hospitalier Emile Muller, Mulhouse: Josette Gally, Samy Khebbeb; Hôpital de Haute-pierre-Hôpitaux Universitaires de Strasbourg, Strasbourg: Jean-Etienne Herbrecht, Francis Schneider; Center Hospitalier de Dieppe, Dieppe: PierreLouis M. Declercq, Jean-Philippe Rigaud; Bicetre, Le Kremlin-Bicetre: Jacques Duranteau, Anatole Harrois; Center Hospitalier Universitaire Gabriel Montpied, Clermont-Ferrand: Russell Chabanne, Julien Marin; Center Hospitalier Universitaire Estaing, Clermont-Ferrand: Charlene Bigot, Sandrine Thibault; Center Hospitalier Intercommunal Eure-Seine Evreux, Evreux: Mohammed Ghazi, Messabi Boukhazna; Center Hospitalier de Châlons en Champagne, Châlons en Champagne: Salem Ould Zein; CH Beauvais, Beauvais: Jack R. Richecoeur, Daniele M. Combaux; Center Hospitalier Le Mans, Le Mans: Fabien Grelon, Charlene Le Moal; Hôpital Fleury, Bourg-en-Bresse: Elise P. Sauvadet, Adrien Robine; Hôpital Saint Louis, Paris: Virginie Lemiale, Danielle Reuter; Service de Pneumologie Pitié-Salpêtrière, Paris: Martin Dres, Alexandre Demoule; Center Hospitalier Gonesse, Gonesse: Dany Goldgran-Toledano; Hôpital Croix Rouse, Lyon: Loredana Baboi, Claude Guérin

**Germany:** St. Nikolaus-Stiftshospital, Andernach: Ralph Lohner; Fachkrankenhaus Coswig GmbH, Coswig: Jens Kraßler, Susanne Schäfer; University Hospital Frankfurt, Frankfurt am Main: Kai D. Zacharowski, Patrick Meybohm; Department of Anesthesia and Intensive Care Medicine, University Hospital of Leipzig, Leipzig: Andreas W. Reske, Philipp Simon; Asklepios Klinik Langen, Langen: HansBernd F. Hopf, Michael Schuetz; Städtisches Krankenhaus Heinsberg, Heinsberg: Thomas Baltus

**Greece:** Hippokrateion General Hospital of Athens, Athens: Metaxia N. Papanikolaou, Theonymfi G. Papavasiliopoulou; Gh Ahepa, Thessaloniki: Giannis A. Zacharas, Vasilis Ourailogloy; Hippokration General Hospital of Thessaloniki, Thessaloniki: Eleni K. Mouloudi, Eleni V. Massa; Hospital General of Kavala, Kavala: Eva O. Nagy, Electra E. Stamou; Papageorgiou General Hospital, Thessaloniki: Ellada V. Kiourtzieva, Marina A. Oikonomou

**Guatemala:** Hospital General de Enfermedades, Instituto Guatemalteco de Seguridad Social, Ciudad de Guatemala: Luis E. Avila; Centro Médico Militar, Guatemala: Cesar A. Cortez, Johanna E. Citalán

**India:** Deenanath Mangeshkar Hospital and Research Center, Pune: Sameer A. Jog, Safal D. Sable; Care Institute of Medical Sciences Hospital, Ahmedabad: Bhagyesh Shah; Sanjay Gandhi Postgraduate Institute of Medical Sciences, Lucknow: Mohan Gurjar, Arvind K. Baronia; Rajasthan Hospital, Ahmedabad: Mohammedfaruk Memon; National Institute of Mental Health and Neuro

Sciences, Bangalore: Radhakrishnan Muthuchellappan, Venkatapura J. Ramesh; Anesthesiology Unit of the Kasturba Medical

College and Department of Respiratory Therapy, School of Allied Health Sciences, Manipal University, Manipal: Anitha Shenoy, Ramesh Unnikrishnan; Sanjeevan Hospital, Pune: Subhal B. Dixit, Rachana V. Rhayakar; Apollo Hospitals, Chennai: Nagarajan Ramakrishnan, Vallish K. Bhardwaj; Medicine Unit of the Kasturba Medical College and Department of Respiratory Therapy, School of Allied Health Sciences, Manipal University, Manipal: Heera L. Mahto, Sudha V. Sagar; G. Kuppuswamy Naidu Memorial Hospital, Coimbatore: Vijayanand Palaniswamy, Deeban Ganesan

**Iran:** National Research Institute of Tuberculosis and Lung Disease/Masih Daneshvari, Tehran: Seyed Mohammadreza Hashemian, Hamidreza Jamaati; Milad Hospital, Tehran: Farshad Heidari

**Ireland:** St. Vincent's University Hospital, Dublin: Edel A. Meaney, Alistair Nichol; Mercy University Hospital, Cork: Karl M. Knapman, Donall O'Croinin; Cork University Hospital, Cork: Eimhin S. Dunne, Dorothy M. Breen; Galway University Hospital, Galway: Kevin P. Clarkson, Rola F. Jaafar; Beaumont Hospital, Dublin: Rory Dwyer, Fahd Amir; Mater Misericordiae University Hospital, Dublin: Olaitan O. Ajetunmobi, Aogan C. O'Muircheartaigh; Tallaght Hospital, Dublin: Colin S. Black, Nuala Treanor; Saint

James's Hospital, Dublin: Daniel V. Collins, Wahid Altaf

**Italy:** Santa Maria delle Croci Hospital, Ravenna: Gianluca Zani, Maurizio Fusari; Arcispedale Sant'Anna

Ferrara, Ferrara: Savino Spadaro, Carlo A. Volta; Ospedale Profili, Fabriano, Ancona: Romano Graziani, Barbara Brunettini; Umberto I. Nocera Inferiore, Nocera Inferiore Salerno: Salvatore Palmese; Azienda Ospedaliera San Paolo–Polo Universitario–Università degli Studi di Milano, Milan: Paolo Formenti, Michele Umbrello; Sant'Anna, San Fermo Della Battaglia, Como: Andrea Lombardo; Spedali Civili Brescia, Brescia: Elisabetta Pecci, Marco Botteri; Fondazione Istituto di Ricovero e Cura a Carattere Scientifico Ca Granda, Ospedale Maggiore Policlinico, Milan: Monica Savioli, Alessandro Protti; University Campus

Bio-Medico of Rome, Rome: Alessia Mattei, Lorenzo Schiavoni; Azienda Ospedaliera "Mellino Mellini," Chiari, Brescia: Andrea Tinnirello, Manuel Todeschini; Policlinico P. Giaccone, University of Palermo, Palermo: Antonino Giarratano, Andrea Cortegiani; Niguarda Cà Granda Hospital, Milan: Sara Sher, Anna Rossi; A. Gemelli University Hospital, Rome: Massimo M. Antonelli, Luca M. Montini; Ospedale "Sandro Pertini," Rome: Paolo Casalena, Sergio Scafetti; Istituto Mediterraneo per i Trapianti e Terapie ad Alta Specializzazione; Istituto Di Ricovero e Cura a Carattere Scientifico; University of Pittsburgh Medical

Center, Palermo: Giovanna Panarello, Giovanna Occhipinti; Ospedale San Gerardo, Monza: Nicolò Patroniti, Matteo Pozzi; Santa Maria Della Scaletta, Imola: Roberto R. Biscione, Michela M. Poli; Humanitas Research Hospital, Rozzano: Ferdinando Raimondi, Daniela Albiero; Ospedale Desio–Ao Desio–Vimercate, Desio: Giulia Crapelli, Eduardo Beck; Pinetagrande Private Hospital, Castelvoturno: Vincenzo Pota, Vincenzo Schiavone; Istituto di Ricovero e Cura a Carattere Scientifico San Martino Ist, Genova: Alexandre Molin, Fabio Tarantino; Ospedale San Raffaele, Milano: Giacomo Monti, Elena Frati; Ospedali Riuniti Di

Foggia, Foggia: Lucia Mirabella, Gilda Cinnella; Azienda Ospedaliera Luigi Sacco–Polo Universitario, Milano: Tommaso Fossali, Riccardo Colombo.; Azienda OspedalieroUniversitaria Città della Salute e della Scienza di Torino, Turin: Pierpaolo Terragni Ilaria Pattarino; Università degli Studi di Pavia-Fondazione Istituto di Ricovero e Cura a Carattere Scientifico Policlinico San Matteo, Pavia: Francesco Mojoli, Antonio Braschi; Ao Ospedale Civile Legnano, Legnano: Erika E. Borotto; Arnas Ospedale Civico Di Cristina Benfratelli, Palermo: Andrea N. Cracchiolo, Daniela M. Palma; Azienda Ospedaliera Della Provincia Di

Lecco–Ospedale "A. Manzoni," Lecco: Francesco Raponi, Giuseppe Foti; A.O. Provincia Di Lecco–Ospedale Alessandro Manzoni, Lecco: Ettore R. Vascotto, Andrea Coppadoro; Cliniche Universitarie Sassari, Sassari: Luca Brazzi, Leda Floris; Istituto di Ricovero e Cura a Carattere Scientifico Policlinico San Matteo, Pavia: Giorgio A. Iotti, Aaron Venti

**Japan:** Yokohama City University Hospital, Yokohama: Osamu Yamaguchi, Shunsuke Takagi; Toyooka Hospital, Toyooka City: Hiroki N. Maeyama; Chiba University Hospital, Chiba City: Eizo Watanabe, Yoshihiro Yamaji; Okayama University Hospital, Okayama: Kazuyoshi Shimizu, Kyoko Shiozaki; Japanese Foundation for Cancer Research, Cancer Institute Hospital, Department of Emergency Medicine and Critical Care, Tokyo: Satoru Futami; Ibaraki Prefectural Central Hospital, Kasama: Sekine Ryosuke; Tohoku University Hospital, Sendai-Shi: Koji Saito, Yoshinobu Kameyama; Tokyo Medical University Hachioji Medical Center, Hachioji, Tokyo: Keiko Ueno;

Tokushima University Hospital, Tokushima: Masayo. Izawa, Nao Okuda; Maebashi Red Cross Hospital, Gunma Maebashi: Hiroyuki Suzuki, Tomofumi Harasawa; Urasoe General Hospital, Urasoe: Michitaka Nasu, Tadaaki Takada; Ohta General Hospital Foundation Ohta Nishinouchi Hospital, Fukushima: Fumihito Ito; Jichi Medical University Hospital, Shimotsuke: Shin Nunomiya, Kansuke Koyama; Mito Kyodo General Hospital, Tsukuba University Hospital Mito Medical Center, Mito: Toshikazu Abe; Sendai City Hospital, Sendai: Kohkichi Andoh, Kohei Kusumoto; Ja Hiroshima General Hospital, Hatsukaichi City, Hiroshima: Akira Hirata, Akihiro Takaba; Yokohama Rosai Hospital, Yokohama: Hiroyasu Kimura; Nagasaki University Hospital, Nagasaki: Shuhei Matsumoto, Ushio Higashijima; Niigata University Medical and Dental Hospital, Niigata: Hiroyuki Honda, Nobumasa Aoki; Mie University Hospital, Tsu, Mie: Hiroshi Imai; Yamaguchi University Hospital, Ube, Yamaguchi: Yasuaki Ogino, Ichiko Mizuguchi; Saiseikai Kumamoto Hospital, Kumamoto City: Kazuya Ichikado; Shinshu University School of Medicine, Matsumoto City: Kenichi Nitta, Katsunori Mochizuki; Kuki General Hospital, Kuki: Tomoaki Hashida; Kyoto Medical Center, Kyoto: Hiroyuki Tanaka; Fujita Health University, Toyoake: Tomoyuki Nakamura, Daisuke Niimi; Rakwakai Marutamachi Hospital, Kyoto: Takeshi Ueda; Osaka University Hospital, Suita City, Osaka Prefecture: Yozo Kashiwa, Akinori Uchiyama

**Latvia:** Paul Stradins Clinical University Hospital, Riga: Olegs Sabelnikovs, Peteris Oss

**Lebanon:** Kortbawi Hospital, Jounieh: Youssef Haddad

**Malaysia:** Hospital Kapit, Kapit: Kong Y. Liew

**Mexico:** Instituto Nacional de Cancerología, Mexico City: Silvio A. Namendys-Silva, Yves D. Jarquin-Badiola; Hospital de Especialidades “Antonio Fraga Mouret” Centro Medico Nacional La Raza Instituto Mexicano del Seguro Social, Mexico City: Luis A. Sanchez-Hurtado, Saira S. Gomez-Flores; Hospital Regional 1° de Octubre, Mexico City: Maria C. Marin, Asisclo J. Villagomez; Hospital General Dr. Manuel Gea Gonzalez, Mexico City: Jordana S. Lemus, Jonathan M. Fierro; Hospital General de Zona No. 1 Instituto Mexicano del Seguro Social Tepic Nayarit, Tepic: Mavy Ramirez Cervantes, Francisco Javier Flores Mejia; Centro Medico Dalinde, Mexico City: Dulce Dector, Alejandro Rojas; Opd Hospital Civil de Guadalajara Hospital Juan I. Menchaca, Guadalajara: Daniel R. Gonzalez, Claudia R. Estrella; Hospital Regional de Ciudad Madero Pemex, Ciudad Madero: Jorge R. Sanchez-Medina, Alvaro Ramirez-Gutierrez; Centro Médico American British Cowdray, Mexico City: Fernando G. George, Janet S. Aguirre; Hospital Juarez de Mexico, Mexico City: Juan A. Buensuseso, Manuel Poblano

**Morocco:** Mohammed V University, University Teaching Ibn Sina Hospital, Rabat: Tarek Dendane, Amine Ali Zeggwagh; Hopital Militaire D’Instruction Mohammed V, Rabat: Hicham Balkhi; Errazi, Marrakech: Mina Elkhayari, Nacer Samkaoui; University Teaching Hospital Ibn Rushd, Casablanca: Hanane Ezzouine, Abdellatif Benslama; Hôpital des Spécialités de Rabat, Rabat: Mourad Amor, Wajdi Maazouzi

**Netherlands:** Tjongerschans, Heerenveen: Nedim Cimic, Oliver Beck; Cwz, Nijmegen: Monique M. Bruns, Jeroen A. Schouten; Rijnstate Hospital, Arnhem: Myra Rinia, Monique Raaijmakers; Radboud Umc, Nijmegen: Leo M. Heunks, Hellen M. Van Wezel; Maastricht University Medical Center, Maastricht: Serge J. Heines, Ulrich Strauch; Catharinaziekenhuis, Eindhoven: Marc P. Buise; Academic Medical Center, Amsterdam: Fabienne D. Simonis, Marcus J. Schultz

**New Zealand:** Tauranga Hospital, Tauranga: Jennifer C. Goodson, Troy S. Browne; Wellington Hospital, Wellington: Leanlove Navarra, Anna Hunt; Dunedin Hospital, Dunedin: Robyn A. Hutchison, Mathew B. Bailey; Auckland City Hospital, Auckland: Lynette Newby, Colin McArthur; Whangarei Base Hospital, Whangarei: Michael Kalkoff, Alex Mcleod; North Shore Hospital, Auckland: Jonathan Casement, Danielle J. Hacking

**Norway:** Ålesund Hospital, Ålesund: Finn H. Andersen, Merete S. Dolva; Oslo University Hospital, Rikshospitalet Medical Center, Oslo: Jon H. Laake, Andreas Barratt-Due; Stavanger University Hospital, Stavanger: Kim Andre L. Noremark, Eldar Søreide; Haukeland University Hospital, Bergen: Brit Å. Sjøbbø, Anne B. Guttormsen

**Peru:** Hospital Nacional Edgardo Rebagliati Martins, Lima: Hector H. Leon Yoshido; Clínica Ricardo Palma, Lima: Ronald Zumaran Aguilar, Fredy A. Montes Oscanoa

**Philippines:** The Medical City, Pasig: Alain U. Alisasis, Joanne B. Robles; Chong Hua Hospital, Cebu: Rossini Abbie B. Pasanting-Lim, Beatriz C. Tan

**Poland:** Warsaw University Hospital, Warsaw: Pawel Andruszkiewicz, Karina Jakubowska

**Portugal:** Centro Hospitalar Da Cova Da Beira, Covilhã: Cristina M. Coxo; Hospital Santa Maria, ChIn, Lisboa: António M. Alvarez, Bruno S. Oliveira; Centro Hospitalar Trás-Os-Montes E. Alto Douro, Hospital de S. Pedro-Vila Real, Vila Real: Gustavo M. Montanha, Nelson C. Barros; Hospital

Beatriz Ângelo, Loures: Carlos S. Pereira, António M. Messias; Hospital de Santa Maria, Lisboa: Jorge M. Monteiro; Centro Hospitalar Médio Tejo–Hospital de Abrantes, Abrantes: Ana M. Araujo, Nuno T. Catorze; Instituto Português de Oncologia de Lisboa, Lisboa: Susan M. Marum, Maria J. Bouw; Hospital Garcia de Orta, Almada: Rui M. Gomes, Vania A. Brito; Centro Hospitalar Do Algarve, Faro: Silvia Castro, Joana M. Estilita; Hospital de Cascais, Alcabideche: Filipa M. Barros; Hospital Prof. Doutor Fernando Fonseca Epe, Amadora: Isabel M. Serra, Aurelia M. Martinho

**Romania:** Fundeni Clinical Institute, Bucharest: Dana R. Tomescu, Alexandra Marcu; Emergency Clinical County Hospital Timisoara, Timisoara: Ovidiu H. Bedreag, Marius Papurica; Elias University Emergency Hospital, Bucharest: Dan E. Corneci, Silviu Ioan Negoita

**Russian Federation:** University Hospital, Kemerovo: Evgeny Grigoriev; Krasnoyarsk Regional Hospital, Krasnoyarsk State Medical University, Krasnoyarsk: Alexey I. Gritsan, Andrey A. Gazenkampf

**Saudi Arabia:** General Intensive Care Unit of Prince Sultan Military Medical City, Riyadh: Ghaleb Almekhlafi, Mohamad M. Albarrak; Surgical Intensive Care Unit of Prince Sultan Military Medical City, Riyadh: Ghanem M. Mustafa; King Faisal Hospital and Research Center, Riyadh: Khalid A. Maghrabi, Nawal Salahuddin; King Fahad Hospital, Baha: Tharwat M. Aisa; Neuro Critical Care Unit, King Abdulaziz Medical City, Riyadh: Ahmed S. Al Jabbary, Edgardo Tabhan; Intensive Care Unit, King Abdulaziz Medical City, Riyadh: Yaseen M. Arabi; Surgical Intensive Care Unit, King Abdulaziz Medical City, Riyadh: Yaseen

M. Arabi, Olivia A. Trinidad; Trauma Intensive Care Unit, King Abdulaziz Medical City, Riyadh: Hasan M. Al Dorzi, Edgardo E. Tabhan

**Serbia:** Clinical Center of Serbia, Belgrade: Vesna Bumbasirevic, Bojan Jovanovic; Military Medical Academy, Belgrade

**South Africa:** Charlotte Maxeke Johannesburg Academic Hospital, Johannesburg: Stefan Bolon, Oliver Smith

**Spain:** Hospital Sant Pau, Barcelona: Jordi Mancebo, Hernan Aguirre-Bermeo; Hospital Universitari Bellvitge, L'Hospitalet de Llobregat, Barcelona: Juan C. Lopez-Delgado, Francisco Esteve; Hospital Son Llatzer, Palma de Mallorca: Gemma Rialp, Catalina Forteza; Sabadell Hospital, Centro de Investigación Biomédica en Red Enfermedades Respiratorias, Sabadell: Candelaria De Haro, Antonio Artigas; Hospital Universitario Central de Asturias, Oviedo: Guillermo M. Albaiceta, Sara De Cima-Iglesias; Complejo

Hospitalario Universitario A Coruña, A Coruña: Leticia Seoane-Quiroga, Alexandra Cenicerós-Barros; Hospital Universitario Miguel Servet, Zaragoza: Antonio L. RuizAguilar, Luis M. Claraco-Vega; Morales Meseguer University Hospital, Murcia: Juan Alfonso Soler, Maria del Carmen Lorente; Hospital Universitario del Henares, Coslada: Cecilia Hermosa, Federico Gordo; Complejo Asistencial de Palencia, Hospital Río Carrión, Palencia: Miryam PrietoGonzález, Juan B. López-Messa; Fundación Jiménez Díaz,

Madrid: Manuel P. Perez, Cesar P. Perez; Hospital Clínico Universitario Lozano Blesa, Zaragoza: Raquel Montoiro Allue; Hospital Verge de la Cinta, Tortosa: Ferran RocheCampo, Marcos Ibañez-Santacruz; Hospital Universitario 12 de Octubre, Madrid: Susana Temprano; Hospital Universitario Príncipe de Asturias, Alcalá de Henares, Madrid: Maria C. Pintado, Raul De Pablo; Hospital Universitari Germans Trias I Pujol, Badalona: Pilar Ricart Aroa Gómez; Hospital Universitario Arnau de Vilanova de Lleida, Lleida:

Silvia Rodriguez Ruiz, Silvia Iglesias Moles; Cst Terrassa, Barcelona: M<sup>a</sup> Teresa Jurado, Alfons Arizmendi; Hospital Universitari Mútua Terrassa, Terrassa: Enrique A. Piacentini; Hospital Universitario de Móstoles, Mostoles: Nieves Franco, Teresa Honrubia; Complejo Asistencial de Salamanca, Salamanca: Meisy Perez Cheng, Elena Perez Losada; Hospital General Universitario de Ciudad Real, Ciudad Real: Javier Blanco, Luis J. Yuste; Torrecardenas, Almeria: Cecilia Carbayo-Gorrioz, Francisca G. Cazorla-Barranquero; Hospital Universitario Donostia, San Sebastian: Javier G. Alonso, Rosa S. Alda; Hospital Universitario de Torrejón, Madrid: Ángela Algaba, Gonzalo Navarro; Hospital Universitario de La Princesa, Madrid: Enrique Cereijo, Esther Diaz-Rodriguez; Hospital Universitario Lucus Augusti, Lugo: Diego Pastor Marcos, Laura Alvarez Montero; Hospital Universitario Santa Lucia, Cartagena: Luis Herrera Para, Roberto Jimenez Sanchez; Hospital Universitario Severo Ochoa, Leganes, Madrid: Miguel Angel Blasco Navalpotro, Ricardo Diaz Abad; University Hospital of Nuestra Señora de Candelaria, Santa Cruz de Tenerife: Raquel Montiel González, Dácil Parrilla Toribio; Hospital Universitario Marques de Valdecilla, Santander: Alejandro G. Castro, Maria Jose D. Artiga; Hospital Infanta Cristina, Parla, Madrid: Oscar Penuelas; Hospital General de Catalunya, Sant Cugat del Valles: Tomas P. Roser, Moreno F. Olga; San Pedro de

Alcántara, Cáceres: Elena Gallego Curto, Rocío Manzano Sánchez; Sant Joan de Reus, Reus: Vallverdu P. Imma, Garcia M. Elisabet; Hospital Joan XXIII, Tarragona: Laura Claverias, Monica Magret; Hospital Universitario de Getafe, Madrid: Ana M. Pellicer, Lucia L. Rodriguez; Hospital Universitario Río Hortega, Valladolid: Jesús Sánchez-Ballesteros, Ángela González-Salamanca; Hospital Arquitecto Marcide, Ferrol, La Coruña: Antonio G. Jimenez, Francisco P. Huerta; Hospital General Universitario Gregorio Marañón, Madrid: Juan Carlos J. Sotillo Diaz, Esther Bermejo Lopez; Hospital General de Segovia, Segovia: David D. Llinares Moya, Alec A. Tallet Alfonso; Hospital General Universitario Reina Sofia, Murcia: Palazon Sanchez Eugenio Luis, Palazon Sanchez Cesar; Complejo Hospitalario Universitario de Albacete, Albacete: Sánchez I. Rafael, Corcoles G. Virgilio; Hospital Infanta Elena, Valdemoro: Noelia N. Recio

**Sweden:** Sahlgrenska University Hospital, Gothenburg: Richard O. Adamsson, Christian C. Rylander; Karolinska University Hospital, Stockholm: Bernhard Holzgraefe, Lars M. Broman; Akademiska Sjukhuset Uppsala, Uppsala: Joanna Wessbergh, Linnea Persson; Vrinnevisjukhuset, Norrköping: Fredrik Schiöler, Hans Kedelv; Linköping University Hospital, Linköping: Anna Oscarsson Tibblin, Henrik Appelberg; Skellefteå Lasarett, Skellefteå: Lars Hedlund, Johan Helleberg; Karolinska University Hospital Solna, Stockholm: Karin E. Eriksson, Rita Glietsch; Umeå University Hospital, Umeå: Niklas Larsson, Ingela Nygren; Danderyd Hospital, Stockholm: Silvia L. Nunes, Anna-Karin Morin; Lund University Hospital, Lund: Thomas Kander, Anne Adolfsson

**Switzerland:** Centre Hospitalier Universitaire Vaudois, Lausanne: Lise Piquilloud; Hôpital Neuchâtelois–La Chaux-de-Fonds, La Chaux-de-Fonds: Hervé O. Zender, Corinne Leemann-Refondini

**Tunisia:** Hopital Taher Sfar Mahdia, Mahdia: Souheil Elatrous; University Hospital Farhat Hached Sousse, Sousse: Slaheddine Bouchoucha, Imed Chouchene; Center Hospitalier Universitaire F. Bourguiba, Monastir: Islem Ouanes; Mongi Slim University Hospital, La Marsa: Asma Ben Souissi, Salma Kamoun

**Turkey:** Cerrahpasa Medical Faculty Emergency Intensive Care Unit, Istanbul: Oktay Demirkiran; Cerrahpasa Medical Faculty Sadi Sun Intensive Care Unit, Istanbul: Mustafa Aker, Emre Erbabacan; Uludag University Medical Faculty, Bursa: Ilkay Ceylan, Nermin Kelebek Girgin; Ankara University Faculty of Medicine, Reanimation 3<sup>rd</sup> Level Intensive Care Unit, Ankara: Menekse Ozcelik, Necmettin Ünal; Ankara University Faculty of Medicine, 2<sup>nd</sup> Level Intensive Care Unit–Postoperative Intensive

Unit, Ankara: Basak Ceyda Meco; Istanbul Kartal Egitim Ve Arastirma Hastanesi, Istanbul: Onat O. Akyol, Suleyman S. Derman

**United Kingdom:** Papworth Hospital, Cambridge: Barry Kennedy, Ken Parhar; Royal Glamorgan Hospital, Llantrisant: Latha Srinivasa; Royal Victoria Hospital, Belfast: Lia McNamee, Danny McAuley; Jack Steinberg Intensive Care Unit of the King's College, London: Phil Hopkins, Clare Mellis; Frank Stansil Intensive Care Unit of the King's College Hospital, London: Vivek Kakar; Liver Intensive Care Unit of the King's College, London: Dan Hadfield; Christine Brown Intensive Care Unit of the King's College, London:

Andre Vercueil; West Suffolk Hospital, Bury St. Edmunds: Kaushik Bhowmick, Sally K. Humphreys; Craigavon Area Hospital, Portadown: Andrew Ferguson, Raymond Mckee; Barts Health National Health Service Trust, Whipps Cross Hospital, Leytonstone: Ashok S. Raj, Danielle A. Fawkes; Kettering General Hospital, Foundation National Health Service Trust, Northamptonshire: Philip Watt, Linda Twohey; Barnet General Hospital, Barnet: Rajeev R. Jha, Matthew Thomas, Alex Morton, Varsha Kadaba; Rotherham General Hospital, Rotherham: Mark J. Smith, Anil P. Hormis; City Hospital, Birmingham: Santhana G. Kannan, Miriam Namih; Poole Hospital National Health Service Foundation Trust, Poole: Henrik Reschreiter, Julie Camsooksai; Weston General Hospital, Weston-Super-Mare: Alek Kumar, Szabolcs Rugonfalvi; Antrim Area Hospital, Antrim: Christopher Nutt, Orla Oneill; Aintree University Hospital, Liverpool: Colette Seasman, Ged Dempsey; Northern General Hospital, Sheffield: Christopher J. Scott, Helen E. Ellis; John Radcliffe Hospital, Oxford: Stuart Mckechnie, Paula J. Hutton; St. Georges Hospital, London: Nora N. Di Tomasso, Michela N. Vitale; Hillingdon Hospital, Uxbridge: Ruth O. Griffin, Michael N. Dean; Royal Bournemouth and Christchurch National Health Service Foundation Trust, Bournemouth: Julius H. Cranshaw, Emma L. Willett; Guy's and St. Thomas' National Health Service Foundation Trust, London: Nicholas Ioannou, Guy's and St. Thomas' Severe Respiratory Failure Service, Whittington Hospital, London: Sarah Gillis; Wexham Park Hospital, Slough: Peter Csabi; Western General Hospital, Edinburgh: Rosaleen Macfadyen, Heidi Dawson; Royal Preston Hospital, Preston: Pieter D. Preez, Alexandra J. Williams;



Brighton and Sussex University Hospitals National Health Service Trust, Brighton: Owen Boyd, Laura Ortiz-Ruiz de Gordo; East and North Herts National Health Service Trust, Stevenage: Jon Bramall, Sophie Symmonds; Barnsley Hospital, Barnsley: Simon K. Chau, Tim Wenham; Prince Charles Hospital, Merthyr Tydfil: Tamas Szakmany, Piroska Toth-Tarsoly; University Hospital of South Manchester National Health Service Foundation Trust, Manchester: Katie H. Mccalman,

Peter Alexander; Harrogate District Hospital, Harrogate: Lorraine Stephenson, Thomas Collyer; East and North Herts National Health Service Trust, Welwyn Garden City: Rhiannon Chapman, Raphael Cooper; Western Infirmary, Glasgow: Russell M. Allan, Malcolm Sim; Dumfries and Galloway Royal Infirmary, Dumfries: David W. Wrathall, Donald A. Irvine; Charing Cross Hospital, London: Kim S. Zantua, John C. Adams; Worcestershire Royal Hospital, Worcester: Andrew J. Burtenshaw, Gareth P. Sellors; Royal

Liverpool University Hospital, Liverpool: Ingeborg D. Welters, Karen E. Williams; Royal Alexandra Hospital, Glasgow: Robert J. Hessell, Matthew G. Oldroyd; Morrilton Hospital, Swansea: Ceri E. Battle, Suresh Pillai; Frimley Park Hospital, Frimley: Istvan Kajtor, Mageswaran Sivashanmugavel; Altnagelvin Hospital, Derry: Sinead C. Okane, Adrian Donnelly; Buckinghamshire Healthcare National Health Service Trust, High Wycombe, Buckinghamshire: Aniko D. Frigyik, Jon P. Careless; Milton Keynes Hospital, Milton Keynes: Martin M. May, Richard Stewart; Ulster Hospital, Belfast: T. John Trinder, Samantha J. Hagan; University Hospital of Wales, Cardiff: Jade M. Cole; Freeman Hospital, Newcastle upon Tyne: Caroline C. MacFie, Anna T. Dowling

**Uruguay:** Hospital Español, Montevideo: Javier Hurtado, Nicolás Nin; Cudam, Montevideo: Javier Hurtado; Sanatorio Mautone, Maldonado: Edgardo Nuñez; Sanatorio Americano, Montevideo: Gustavo Pittini, Ruben Rodriguez; Hospital de Clínicas, Montevideo: María C. Imperio, Cristina Santos; Circulo Católico Obreros Uruguay–Sanatorio Juan Pablo II, Montevideo: Ana G. França, Alejandro Ebeid; Centro de Asistencia del Sindicato Médico del Uruguay, Montevideo: Alberto Deicas, Carolina Serra

**United States:** St. Louis University Hospital, St. Louis, Missouri: Aditya Uppalapati, Ghassan Kamel; Beth Israel Deaconess Medical Center, Boston, Massachusetts: Valerie M. Banner-Goodspeed, Jeremy R. Beitler; Memorial Medical Center, Springfield, Illinois: Satyanarayana Reddy Mukkera, Shreedhar Kulkarni; Massachusetts General Hospital, Boston, Massachusetts: Jarone Lee, Tomaz Mesar; University of Cincinnati Medical Center, Cincinnati, Ohio: John O. Shinn III, Dina Gomaa; Massachusetts General Hospital, Boston, Massachusetts: Christopher Tainter, Jarone Lee; Massachusetts General Hospital, Boston, Massachusetts: Tomaz Mesar, Jarone Lee; R. Adams Cowley Shock Trauma Center, Baltimore, Maryland: Dale J. Yeatts, Jessica Warren; Intermountain Medical Center, Murray, Utah: Michael J. Lanspa, Russel R. Miller; Intermountain Medical Center, Murray, Utah: Colin K. Grissom, Samuel M. Brown; Mayo Clinic, Rochester, Minnesota: Philippe R. Bauer; North Shore Medical Center, Salem, Massachusetts: Ryan J. Gosselin, Barrett T. Kitch; Albany Medical Center, Albany, New York: Jason E. Cohen, Scott H. Beegle, Shazia Choudry; John H. Stoger Hospital of Cook County, Chicago, Illinois: Renaud M. Gueret, Aiman Tulaimat; University of Alabama at Birmingham, Birmingham, Alabama: William Stigler, Hitesh Batra; Duke University Hospital, Durham, North Carolina: Nidhi G. Huff; Iowa Methodist Medical Center, Des Moines, Iowa: Keith D. Lamb, Trevor W. Oetting; Surgical and Neurosciences Intensive Care Unit of the University of Iowa Hospitals and Clinics, Iowa City, Iowa: Nicholas M. Mohr, Claine Judy; Medical Center of Louisiana at New Orleans, New Orleans, Louisiana: Shigeki Saito, Fayez M. Kheir; Tulane University, New Orleans, Louisiana: Fayez Kheir; Critical Care Unit of the University of Iowa Hospitals and Clinics, Iowa City, Iowa: Adam B. Schlichting, Angela Delsing; University of California, San Diego Medical Center, San Diego, California: Daniel R. Crouch, Mary Elmasri; University of California San Diego Thornton Hospital, La Jolla, California: Daniel R. Crouch, Dina Ismail; University Hospital, Cincinnati, Ohio: Kyle R. Dreyer, Thomas C. Blakeman, Dina Gomaa; Tower 3B Medical Intensive Care Unit of Brigham and Women's Hospital, Boston, Massachusetts: Rebecca M. Baron, Carolina Quintana Grijalba; Tower 8C Burn/Trauma Intensive Care Unit of Brigham and Women's Hospital, Boston, Massachusetts: Peter C. Hou; Tower 8D Surgical Intensive Care Unit of Brigham and Women's Hospital, Boston, Massachusetts: Raghu Seethala; Tower 9C Neurosurgical Intensive Care Unit of Brigham and Women's Hospital, Boston, Massachusetts: Imo Aisiku; Tower 9D Neurological Intensive Care Unit of Brigham and Women's Hospital, Boston, Massachusetts: Galen Henderson; Tower 11C Thoracic Intensive Care Unit of Brigham and Women's Hospital, Boston, Massachusetts: Gyorgy Frenzl; Shapiro 6W Cardiac Surgery Intensive Care Unit of Brigham and

Women's Hospital, Boston, Massachusetts: Sen-Kuang Hou; Shapiro 9E Coronary Care Unit of Brigham and Women's Hospital, Boston, Massachusetts: Robert L. Owens, Ashley Schom

## **e-Methods 1**

### **LUNG-SAFE Study Design and Data Collection**

All patients admitted to an ICU (including inter-ICU transfers) within a four-week enrolment window during winter who received invasive or non-invasive ventilation were included. Exclusion criteria were patients younger than 16 years of age or inability to obtain informed consent (if required).

Following enrolment, patients were evaluated daily for acute hypoxemic respiratory failure, defined as the concurrent presence of (1) ratio of arterial oxygen tension to inspired fraction of oxygen of 300mmHg or less; (2) new pulmonary parenchymal abnormalities on chest x-ray or computed tomography; and (3) ventilatory support with continuous positive airway pressure (CPAP), expiratory positive airway pressure (EPAP), or positive end-expiratory pressure (PEEP) of 5 cmH<sub>2</sub>O or more.

Day 1 was defined as the first day that acute hypoxemic respiratory failure criteria were met, irrespective of ICU admission date. Patient baseline demographics were collected on day 1. An expanded dataset was provided for days 1, 2, 3, 5, 7, 10, 14, 21, and 28 or at ICU discharge or death.

Unless otherwise stated, all data were recorded at the same time – normally as close as possible to 10:00 each day. The following items were included in the extended dataset\*:

- Arterial pH, arterial oxygen tension, arterial carbon dioxide tension, inspired fraction of oxygen and oxygen saturation
- Availability of chest radiography, presence of bilateral opacities and number of involved quadrants
- Mode of ventilatory support (invasive/non-invasive and modality)
- Ventilatory settings including total and set respiratory rate, tidal volume, PEEP, plateau pressure (if available), peak inspiratory pressure, mean airway pressure, oxygen flow
- Use of adjunctive therapies/monitoring in the last 24 hours including prone positioning, recruitment manoeuvres, extra-corporeal membrane oxygenation, high dose corticosteroids, almitrine besylate, continuous sedation, oesophageal pressure monitoring, continuous neuromuscular blocking agents, pulmonary artery catheter, alveolar surfactant, lung

ultrasound, renal replacement therapy, tracheostomy, inhaled vasodilators, neutrophil elastase therapy

- Worst SOFA score over the last 24 hour period

The diagnosis of ARDS in LUNG-SAFE was made by a computer algorithm in the analysis phase of the study using the “raw” data that made up the various components of the Berlin ARDS definition.

Patients with ARDS undergoing invasive ventilation were categorized on the day of ARDS diagnosis based on their PaO<sub>2</sub>/FIO<sub>2</sub> ratio into mild ( $200 < \text{PaO}_2/\text{FIO}_2 \leq 300$  mm Hg), moderate ( $100 < \text{PaO}_2/\text{FIO}_2 \leq 200$  mm Hg), and severe ( $\text{PaO}_2/\text{FIO}_2 < 100$  mm Hg).

Patient outcomes included date of liberation from mechanical ventilation and vital status at ICU discharge and at either hospital discharge or at day 90, whichever occurred earlier.

## **eMethods-2**

### **Predictor variables for assignment of sub-phenotypes in LUNG-SAFE dataset**

Predictor variables used in the clinical classifier model used to assign sub-phenotypes in the LUNG-SAFE dataset included; Respiratory Rate (breaths/min), Mean Arterial Pressure (mmHg), Vasopressor Use (yes/no), Platelet Count ( $10^3/\mu\text{L}$ ), Creatinine (mg/dL), Bicarbonate (mmol/L), Bilirubin (mg/dL).

### **eMethods-3**

#### **Propensity score matching to reduce imbalance between comparator groups in models 1-4**

We used propensity score (PS) matching to improve balance between exposed and control groups; to reduce the impact of confounding. The propensity score is the probability of exposure – in this case to ARDS/AHRF/AHRF-UL – conditional on baseline characteristics.

Exposed and control groups varied in each model, depending on the AF estimate of interest. In model-1, exposed group was patients with ARDS compared to non-AHRF controls; in model-2, exposed group was patients with ARDS compared to AHRF-UL controls; in model-3, exposed group was patients with AHRF compared to non-AHRF controls; and, in model-4, exposed group was patients with AHRF-UL compared to non-AHRF controls.

We estimated propensity scores using logistic regression; and then matched populations using nearest neighbour matching without replacement. Matching without replacement minimises dependence between control and exposed patients, and maximises effect size (and therefore, precision).

The number of matched control units was determined by the size of the selected control population. In model-1, 3, and 4 which used non-AHRF controls (n=8407), we used a 1:2 ratio; In model-2, which used AHRF-UL patients (n = 851) as controls, we used a 1:1 ratio. Each exposed individual (ARDS/AHRF/AHRF-UL, depending on the model) was paired with a control(s) with the smallest propensity score difference.

#### **Selection of matching variables**

Matching variables differed by model: predominantly due to availability of data. The LUNG-SAFE study collected a limited dataset for non-AHRF patients; the only potential confounders available for PS matching for these patients – used as controls in Model-1, Model-3 and Model-4 - were age and sex. Data collection for patients with AHRF was more extensive; In Model-2, which compared ARDS patients to AHRF-UL patients, we propensity matched on age, sex, number of comorbidities and receipt of invasive mechanical ventilation. There was no data missing for these variables in the ARDS or AHRF-UL populations. We used a caliper width of +/- 5 years for age: patients with similar propensity scores with a difference in age > 5 years were not matched.

We did not match for illness severity (measured by non-respiratory SOFA score); instead, to account for marginal effects, we included it as a covariate in the logistic regression model used to calculate AF. Graphical representations of each model are shown in eFigure-1.

#### **Assessment of balance and overlap**

We assessed balance post matching by estimating standardized mean differences and examining empirical cumulative density function (eCDF) plots for the variables used for matching. We assessed overlap by comparing jitter plots for the matched and unmatched exposed and control groups.

#### **Estimation of AF**

We used unconditional logistic regression to calculate AF as we matched on an individual basis without replacement (therefore reducing dependency between cases and controls), and because the size of our dataset meant that we did not have sparse data bias.

We excluded AHRF patients in all four models who were missing data for severity of hypoxaemia, or maximum number of quadrants involved, when estimating AF for these enrichment categories. Sub-phenotype data (hypoinflammatory vs hyperinflammatory) were only available for patients with ARDS.

|                                          | <b>Auriemma et al (2020)</b>                                                                                                  | <b>Torres et al (2021)</b>                                                         | <b>Saha et al (2023)</b>                                                                                |
|------------------------------------------|-------------------------------------------------------------------------------------------------------------------------------|------------------------------------------------------------------------------------|---------------------------------------------------------------------------------------------------------|
| <b>Data source</b>                       | Prospective cohort study; EARLI and VALID studies                                                                             | Prospective cohort study                                                           | Prospective cohort study; LUNG-SAFE                                                                     |
| <b>Geographical region</b>               | United States of America                                                                                                      | United States of America<br>South Korea                                            | Multinational                                                                                           |
| <b>Selected cohort</b>                   | Mechanically ventilated patients with sepsis                                                                                  | ICU patients with sepsis                                                           | Mechanically ventilated patients                                                                        |
| <b>Patients with ARDS (n)</b>            | EARLI; 195<br>VALID; 99                                                                                                       | 141                                                                                | Model-1; 2653<br>Model-2; 851                                                                           |
| <b>Statistical method to estimate AF</b> | Logistic regression                                                                                                           | Survival analysis with targeted minimum loss-based estimation                      | Logistic regression (in propensity score matched population)                                            |
| <b>Variables adjusted</b>                | Age, sex, race, chronic comorbidities, illness severity (SAPS II/APACHE II/APACHE III), acute comorbidities (shock/pneumonia) | Age, sex, chronic comorbidities, illness severity, invasive mechanical ventilation | Age, sex, chronic comorbidities, illness severity (non-pulmonary SOFA), invasive mechanical ventilation |
| <b>AF estimate (95% CI)</b>              | EARLI; 27% (14 - 37%)<br>VALID; 37% (10 - 51%)                                                                                | 15% (3 - 26%)                                                                      | Model-1; 38% (34 - 42%)<br>Model-2; 21% (11 - 31%)                                                      |

**eTable-1 Comparison of studies estimating AF<sub>ARDS</sub>**

AF; attributable fraction, ARDS; Acute Respiratory Distress Syndrome, EARLI (Early Assessment of Renal and Lung Injury); VALID (Validating Acute Lung Injury Markers for Diagnosis); LUNG-SAFE; Large Observational Study to Understand the Global Impact of Severe Acute Respiratory Failure) Although there are different statistical approaches to estimate AF (see above), we used logistic regression as has been described previously.



| Variable                                               | Missing n (%)    |                   |
|--------------------------------------------------------|------------------|-------------------|
|                                                        | ARDS<br>N = 2653 | AHRF-UL<br>N= 851 |
| PaO <sub>2</sub> :FiO <sub>2</sub> ratio on day 1      | 1 (0.0)          | 1 (0.1)           |
| Maximum number of quadrants involved in first 48 hours | -                | 17 (2.0)          |
| Sub-phenotype                                          | -                | 851 (100.0)       |
| Non respiratory SOFA score day 1                       | 5 (0.2)          | -                 |
| Duration of invasive mechanical ventilation            | 400 (15.1)       | 150 (17.6)-       |
| Hospital LOS                                           | 57 (2.1)         | 21 (2.5)          |
| Hospital mortality                                     | 10 (0.4)         | 4 (0.5)           |

**eTable-2a. Summary of missing data for ARDS and AHRF patients**

Variables excluded from eTable-2a had no missing data. Sub-phenotype data was not available for AHRF-UL patients. There was a low proportion of missing data (<2.0%) for all variables used in our propensity score models and for stratification by enrichment criteria. Duration of invasive mechanical ventilation and hospital LOS were not used as outcomes measures in our analyses.

AHRF- UL: acute hypoxaemic respiratory failure with unilateral infiltrates; ARDS; acute respiratory distress syndrome; FiO<sub>2</sub>: inspired fraction of oxygen; ICU: intensive care unit; LOS; length of stay; PaO<sub>2</sub>: arterial oxygen tension; SOFA: sequential organ failure assessment

|                       | Non-AHRF controls (N = 8407) |
|-----------------------|------------------------------|
| Age (years) Mean (SD) | 61.1 (17.2)                  |
| Sex Female n (%)      | 3434 (40.8)                  |
| ICU LOS Mean (SD)     | 6.2 (8.0)                    |
| ICU mortality n (%)   | 1194 (14.0)                  |

**eTable-2b. Variables reported for non-AHRF controls**

AHRF: acute hypoxaemic respiratory failure; ICU: intensive care unit; LOS: length of stay; SD: standard deviation

| Severity of hypoxaemia;<br>PaO <sub>2</sub> :FiO <sub>2</sub> (mmHg) | Maximum number of quadrants involved on chest radiograph<br>in first 48 hours |             |            |
|----------------------------------------------------------------------|-------------------------------------------------------------------------------|-------------|------------|
|                                                                      | Two n (%)                                                                     | Three n (%) | Four n (%) |
| Mild; > 200                                                          | 394 (51.8)                                                                    | 158 (20.8)  | 208 (27.4) |
| Moderate; 100 – 200                                                  | 499 (39.5)                                                                    | 318 (25.2)  | 446 (35.3) |
| Severe; < 100                                                        | 151 (24.1)                                                                    | 139 (22.2)  | 336 (53.7) |

**eTable-3a. Relationship between severity of hypoxaemia and chest radiograph findings in LUNGSAFE cohort.**

| Severity of hypoxaemia;<br>PaO <sub>2</sub> :FiO <sub>2</sub> (mmHg) | ARDS sub-phenotype     |                         |
|----------------------------------------------------------------------|------------------------|-------------------------|
|                                                                      | Hypoinflammatory n (%) | Hyperinflammatory n (%) |
| Mild; > 200                                                          | 581 (76.4)             | 179 (23.6)              |
| Moderate; 100 – 200                                                  | 929 (73.6)             | 334 (26.4)              |
| Severe; < 100                                                        | 452 (72.2)             | 174 (27.8)              |

**eTable-3b. Relationship between severity of hypoxaemia and ARDS sub-phenotype in LUNGSAFE cohort**

ARDS: acute respiratory distress syndrome

|                                             | Model-1<br>AF <sub>ARDS</sub> |                          |             | Model-2<br>AF <sub>ARDS</sub> |                        |             | Model-3<br>AF <sub>AHRF</sub> |                          |             | Model-4<br>AF <sub>AHRF-UL</sub> |                          |             |
|---------------------------------------------|-------------------------------|--------------------------|-------------|-------------------------------|------------------------|-------------|-------------------------------|--------------------------|-------------|----------------------------------|--------------------------|-------------|
|                                             | ARDS<br>(N=2653)              | Non-<br>AHRF<br>(N=5306) | Std<br>Diff | ARDS<br>(N=851)               | AHRF-<br>UL<br>(N=851) | Std<br>Diff | AHRF<br>(N=3504)              | Non-<br>AHRF<br>(N=7008) | Std<br>Diff | AHRF-<br>UL<br>(N=851)           | Non-<br>AHRF<br>(N=1702) | Std<br>Diff |
| <b>Age (years)</b><br>Mean (SD)             | 61.5<br>(16.8)                | 61.4<br>(16.8)           | 0.00        | 63.0<br>(16.2)                | 63.0<br>(16.9)         | 0.00        | 61.8<br>(16.8)                | 62.0<br>(16.8)           | 0.00        | 63.0<br>(16.9)                   | 63.0<br>(16.8)           | 0.00        |
| <b>Sex Female</b><br>n (%)                  | 1014<br>(38.2)                | 2028<br>(38.2)           | 0.00        | 297<br>(34.9)                 | 301<br>(35.4)          | -0.01       | 1315<br>(37.5)                | 2664<br>(38.0)           | -0.01       | 301<br>(35.4)                    | 599<br>(35.2)            | 0.01        |
| <b>Number of<br/>comorbidities</b><br>n (%) |                               |                          |             |                               |                        |             |                               |                          |             |                                  |                          |             |
| 0                                           | NMV                           |                          |             | 330<br>(38.8)                 | 322<br>(37.8)          | 0.02        | NMV                           |                          |             | NMV                              |                          |             |
| 1                                           | NMV                           |                          |             | 302<br>(35.5)                 | 302<br>(35.5)          | 0.00        | NMV                           |                          |             | NMV                              |                          |             |
| 2 or more                                   | NMV                           |                          |             | 219<br>(25.7)                 | 227<br>(26.7)          | -0.02       | NMV                           |                          |             | NMV                              |                          |             |
| <b>Ventilated on<br/>day 1 n (%)</b>        | NMV                           |                          |             | 700<br>(82.3)                 | 698<br>(82.0)          | 0.01        | NMV                           |                          |             | NMV                              |                          |             |

**eTable-4 Matching variables for propensity models used to estimate attributable fraction**

AF<sub>ARDS</sub> in Model-1 was estimated by matching 2653 ARDS patients to non-AHRF controls that were propensity score balanced on age and sex in a 1:2 ratio. AF<sub>ARDS</sub> in Model-2 was estimated by matching 851 ARDS patients to AHRF-UL controls in a 1:1 ratio and propensity score balanced on age, sex, number of comorbidities, and ventilation status on day 1. AF<sub>AHRF</sub> in Model-3 was estimated by matching 3504 AHRF cases to non-AHRF controls that were propensity score balanced on age and sex in a 1:2 ratio. AF<sub>AHRF-UL</sub> in Model-4 was estimated by matching 851 AHRF-UL cases to non-AHRF controls that were propensity score balanced on age and sex in a 1:2 ratio.

Mean or proportion (as applicable) are shown for exposed and control populations for each variable. Post matching standardised mean differences (Std Diff) for the matching covariates in each model were all < 0.05. NMV denotes a variable that was not matched for that specific model.

ARDS: acute respiratory distress syndrome; AHRF: acute hypoxaemic respiratory failure; AHRF-UL: acute hypoxaemic respiratory failure with unilateral infiltrates only; Std Diff: standardised mean difference; SD: standard deviation; NMV: non-matched variable.

**Model 1:  $AF_{ARDS}$  estimate**

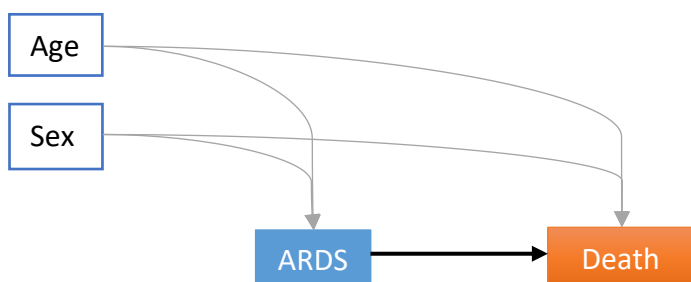

Matched to ICU controls receiving mechanical ventilation without AHRF

**Model 2:  $AF_{ARDS}$  estimate**

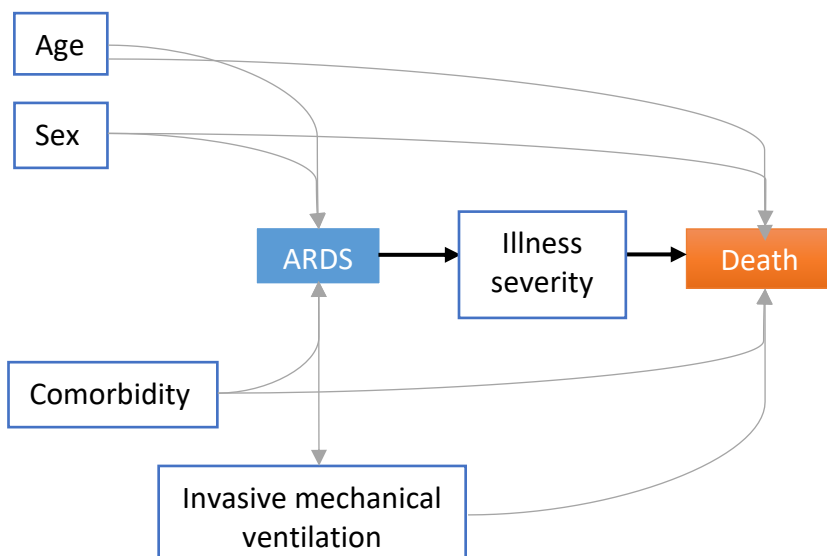

Matched to ICU controls receiving mechanical ventilation with AHRF with unilateral infiltrates only

**Model 3:  $AF_{AHRF}$  estimate**

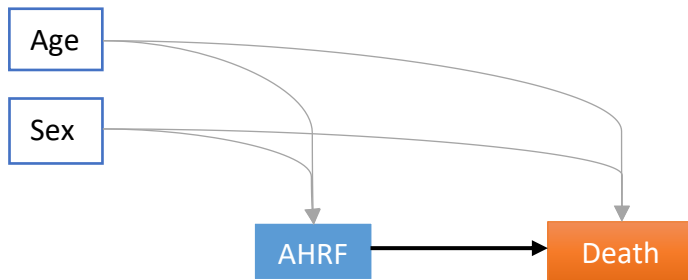

Matched to ICU controls receiving mechanical ventilation without AHRF

**Model 4:  $AF_{AHRF-UL}$  estimate**

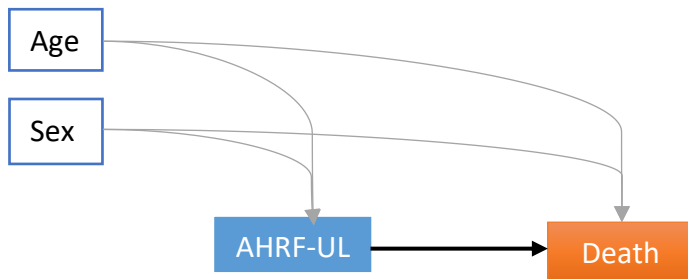

Matched to ICU controls receiving mechanical ventilation without AHRF

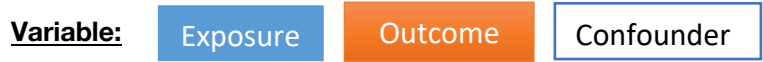

**eFigure-1. Matching procedures to generate models to estimate AF**

Propensity score matching was used to estimate the effect of the exposure (ARDS/AHRF/AHRF-UL) on ICU mortality while controlling for measured confounding variables. Relationships between exposures, outcomes, and confounding variables for all 4 models used in our analysis are shown in the figure.

As a limited dataset was collected for non-AHRF ICU controls in the LUNG SAFE study, the only potential confounders available for these patients were age and sex. Model-1, Model-3 and Model-4 were propensity matched on age and sex only.

A more extensive dataset was collected for all patients with AHRF. In Model-2, we additionally propensity matched on number of comorbidities and receipt of invasive mechanical ventilation, as well as age and sex. Illness severity (measured by non-respiratory SOFA score) was not matched. Instead, it was included in the regression model as a mediator variable.

A.

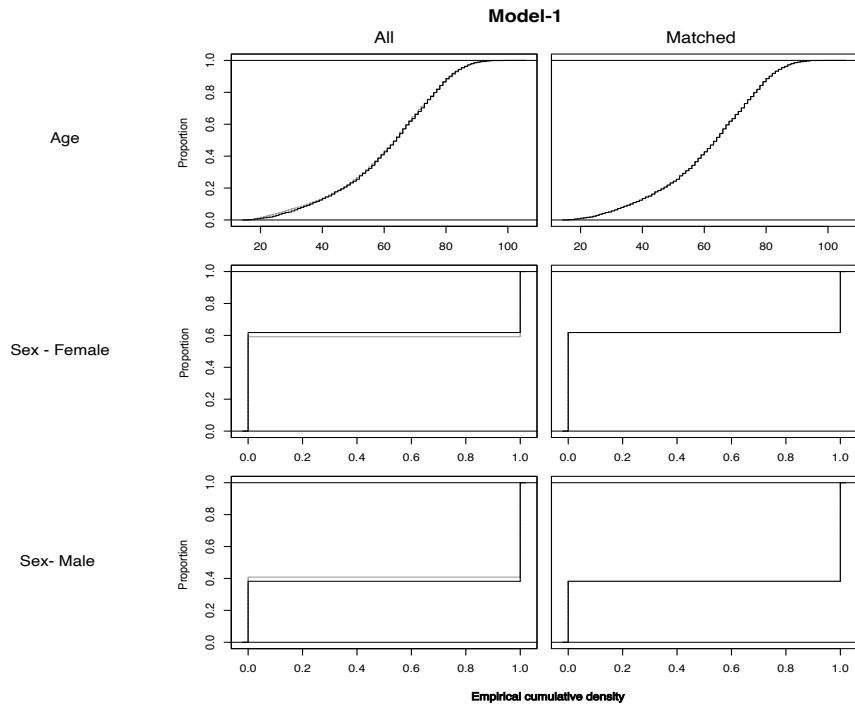

B.

Model-2

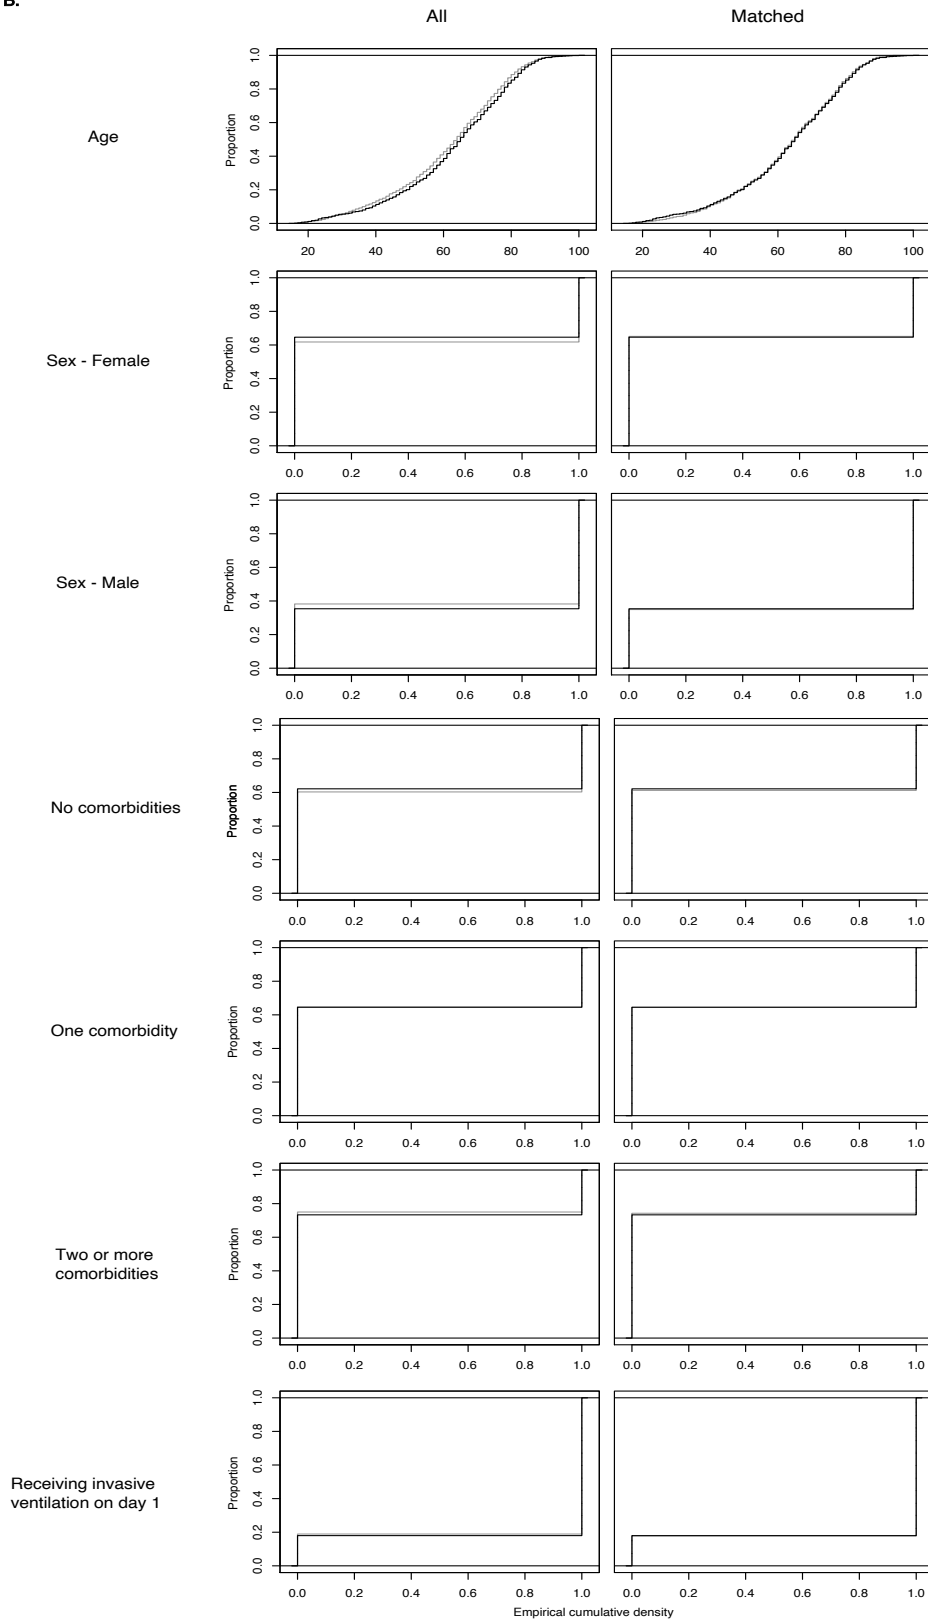

C.

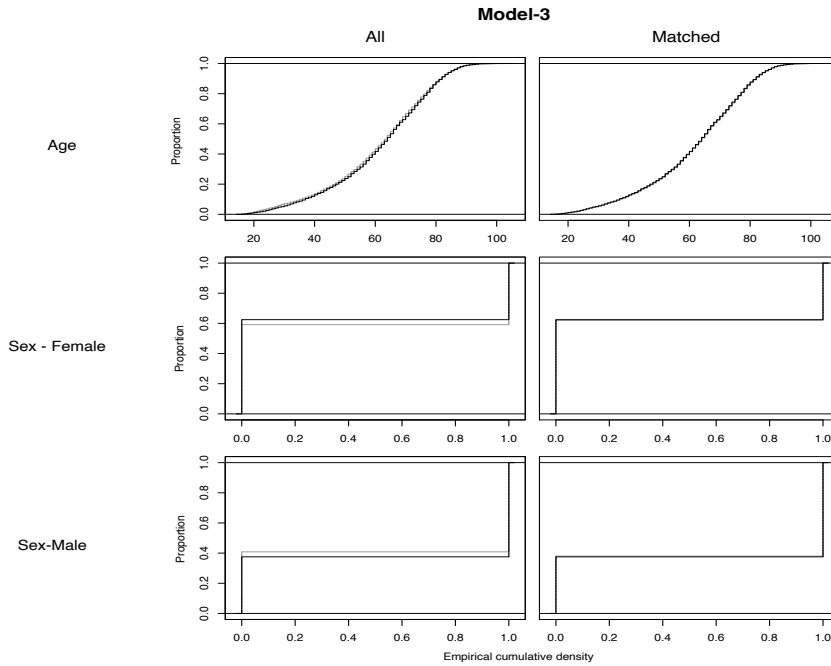

D.

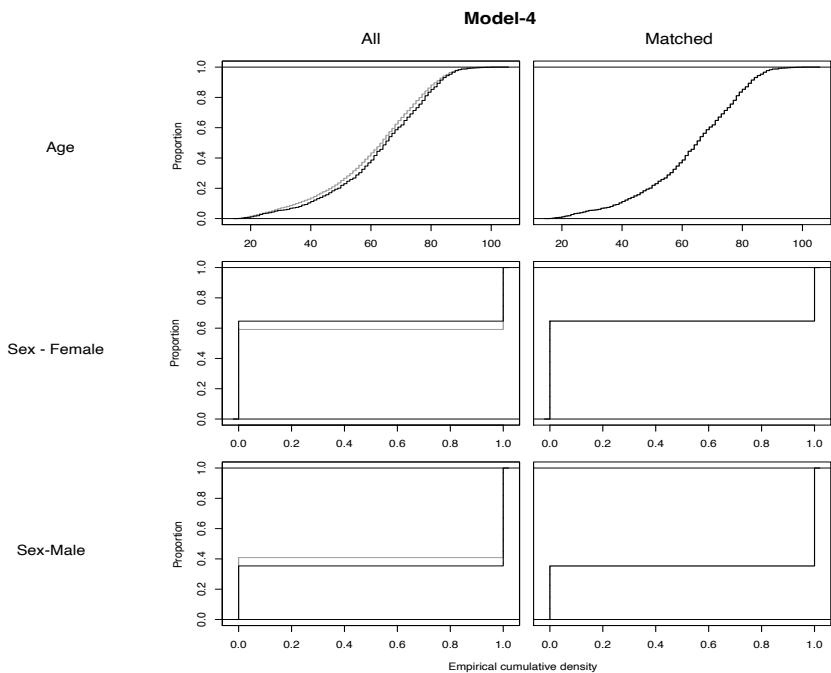

**eFigure-2. Assessment of balance post-matching using empirical cumulative density function plots for matching variables.**

Empirical cumulative densities for each covariate are displayed on the x-axis and the proportion of the sample at, or less than, the covariate value are displayed on the y-axis. The black line corresponds to exposed group (ARDS/AHRF/AHRF-UL, as applicable) and the grey line to the control group (non-AHRF/AHRF-UL, as applicable). Perfectly overlapping lines indicated good balance. The panel on the left shows balance pre-matching; the panel on the right shows balance post-matching.

A. Covariates used for matching in model-1: ARDS vs non-AHRF controls; B. Covariates used for matching in model-2: ARDS vs AHRF-UL controls; C. Covariates used for matching in model-3: AHRF vs non-AHRF controls; D. Covariates used for matching in model-4: AHRF-UL vs non-AHRF controls.



**Model 1: ARDS vs non-AHRF controls**

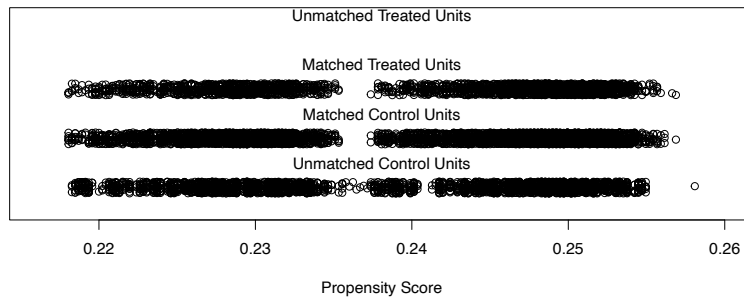

**Model 2: ARDS vs AHRF controls**

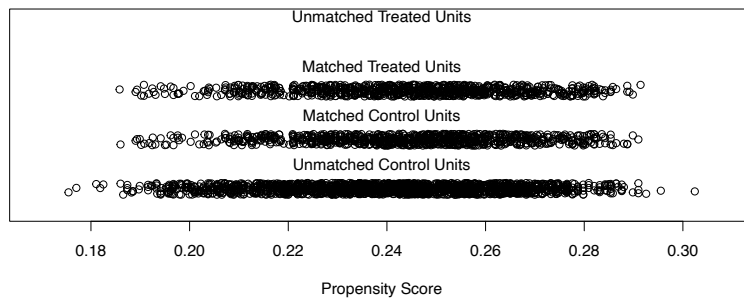

**Model 3: AHRF vs non-AHRF controls**

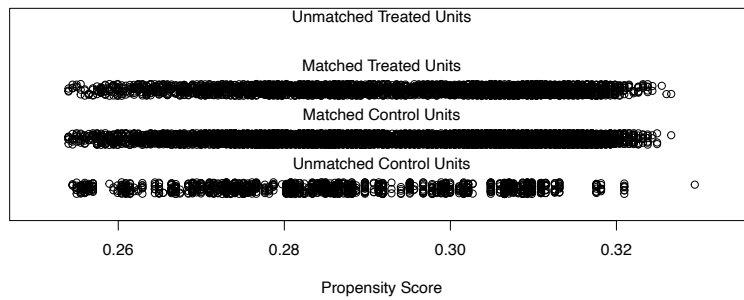

**Model 4: AHRF-UL vs non-AHRF controls**

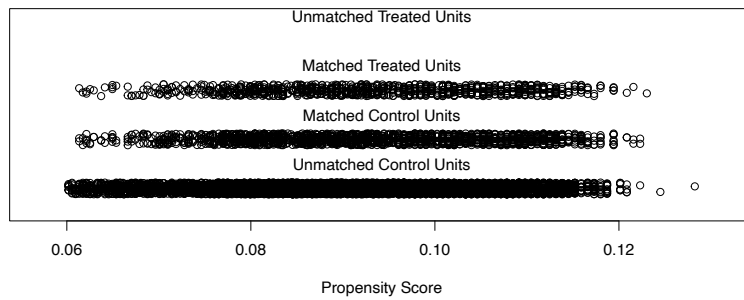

**eFigure-3. Assessment of overlap post-matching using jitter plots to compare propensity scores for matched and unmatched control/treatment groups.**
